# Supplementary material for: An improved hydro-biogeochemical model (CNMM-DNDC V6.0) for simulating dynamical forest-atmosphere exchanges of carbon and evapotranspiration at typical sites subject to subtropical and temperate monsoon climates in eastern Asia
Source: Copernicus journal article supplement (doi:10.5194/gmd-2024-141), 2024-08-30
Supplement: Supplementary file 1 [file gmd-2024-141-supplement.pdf]

**Table S1** The parameters related to litter decomposition.

| Litter carbon pools  | $f_{HR}^a$ | $R_{dec} (d^{-1})^b$ |
|----------------------|------------|----------------------|
| Liable carbon        | 0.39       | 0.7                  |
| Unshielded cellulose | 0.55       | 0.07                 |
| Lignin               | 0.29       | 0.014                |

<sup>a</sup> The fractions of heterotrophic respiration during the litter carbon decomposition. <sup>b</sup> The constant rate for the decomposition of litter carbon to soil carbon.

**Table S2** Site information.

| Site <sup>a</sup>                                  | CBM                                                           | QYZ                           | DHM                                                                                         |
|----------------------------------------------------|---------------------------------------------------------------|-------------------------------|---------------------------------------------------------------------------------------------|
| Location                                           | 42°24'09" N<br>128°05'45" E                                   | 26°44'29" N<br>115°03'29" E   | 23°10'25" N<br>112°32'04" E                                                                 |
| Elevation (m)                                      | 738                                                           | 102                           | 300                                                                                         |
| Stand age (years)                                  | ~200                                                          | 37                            | ~100                                                                                        |
| Canopy height (m)                                  | 27                                                            | 12                            | 17.5                                                                                        |
| LAI <sup>b</sup> (m <sup>2</sup> m <sup>-2</sup> ) | 6.1                                                           | 3.5                           | 5.2                                                                                         |
| Soil type <sup>c</sup>                             | Montane dark<br>brown forest<br>soil/ Cambosols/<br>Cambisols | Red<br>Ferrosols/<br>Acrisols | soil/ Lateritic red soil/<br>Ferrosols/<br>Acrisols, yellow<br>soil/ Ferrosols/<br>Acrisols |
| SOC <sup>d</sup> (g C kg <sup>-1</sup> )           | 50.8                                                          | 12.4                          | 21.9                                                                                        |
| Soil pH <sup>d</sup>                               | 5.0                                                           | 4.7                           | 3.8                                                                                         |
| Soil texture <sup>d</sup>                          | Silt loam                                                     | Silt loam                     | Silt loam                                                                                   |
| Clay <sup>d</sup> (<0.002 mm)                      | 25%                                                           | 15%                           | 19%                                                                                         |
| Silt <sup>d</sup> (0.002–0.05 mm)                  | 59%                                                           | 68%                           | 63%                                                                                         |
| Sand <sup>d</sup> (0.05–2.0 mm)                    | 16%                                                           | 17%                           | 18%                                                                                         |

<sup>a</sup> CBM, QYZ, and DHM are the abbreviations of the site name at the Changbai Mountains, Qiayanzhou and Dinghu Mountains, respectively.

<sup>b</sup> LAI is the abbreviation of leaf area index.

<sup>c</sup> Soil types follows the Chinese Genetic Soil Classification (1993)/ the Chinese Soil Taxonomy (1999)/ World Reference Base for Soil Resources (2014).

<sup>d</sup> Given soil properties are for the depth of 0–20 cm.

**Table S3** Eco-physiological parameters used in modified CNMM-DNDC model for forests in different humid monsoon climate <sup>a</sup>.

| Code   | Parameters (unit)                                                    | CBM <sup>b</sup> |                  | QYZ <sup>c</sup> | DHM <sup>d</sup>   |                  |
|--------|----------------------------------------------------------------------|------------------|------------------|------------------|--------------------|------------------|
|        |                                                                      | (Temperate)      |                  | (Subtropics)     | (South subtropics) |                  |
| p1     | Forest type                                                          | DBT <sup>b</sup> | ENT <sup>b</sup> | ENT <sup>c</sup> | EBT <sup>d</sup>   | ENT <sup>d</sup> |
| p2     | Start Julian date of new growth                                      | 121              | 0                | 0                | 0                  | 0                |
| p3     | End Julian date of litterfall                                        | 275              | 0                | 0                | 0                  | 0                |
| p4     | Transfer growth period as fraction of growing season (dimensionless) | 0.2              | 0.3              | 0.3              | 0.2                | 0.3              |
| p5     | Litterfall as fraction of growing season (dimensionless)             | 0.2              | 0.3              | 0.3              | 0.2                | 0.3              |
| p6     | Annual leaf and fine roots turnover fraction (yr <sup>-1</sup> )     | 1.0              | 0.15             | 0.35             | 0.5                | 0.32             |
| p7     | Annual live wood turnover fraction (yr <sup>-1</sup> )               | 0.7              | 0.7              | 0.7              | 0.7                | 0.7              |
| p8     | Annual plant mortality fraction (yr <sup>-1</sup> )                  | 0.0213           | 0.009            | 0.005            | 0.005              | 0.005            |
| p9     | Annual fire mortality fraction (yr <sup>-1</sup> )                   | 0.0              | 0.0              | 0.005            | 0.0                | 0.005            |
| p10    | New fine root C: new leaf C (DIM)                                    | 0.9              | 1.2              | 1.0              | 1.0                | 1.0              |
| p11    | New stem C: new leaf C (DIM)                                         | 2.4              | 1.4              | 2.2              | 1.6                | 2.2              |
| p12    | New live wood C: new total wood C (dimensionless)                    | 0.1              | 0.379            | 0.1              | 0.22               | 0.1              |
| p13    | New coarse root C: new stem C (dimensionless)                        | 0.23             | 0.29             | 0.3              | 0.3                | 0.3              |
| p14    | Daily allocation to current growth (dimensionless)                   | 0.5              | 0.5              | 0.5              | 0.5                | 0.5              |
| p15    | C:N of leaves (dimensionless)                                        | 17.55            | 34.3             | 42               | 42                 | 42               |
| p16    | C:N of leaf litter (dimensionless)                                   | 41.1             | 96.5             | 93               | 49                 | 93               |
| p17    | C:N of fine roots (dimensionless)                                    | 47.4             | 56.4             | 42               | 42                 | 42               |
| p18    | C:N of live wood (dimensionless)                                     | 97.05            | 97.4             | 50               | 50                 | 50               |
| p19    | C:N of dead wood (dimensionless)                                     | 212              | 398              | 729              | 300                | 729              |
| p20–22 | Leaf litter labile: cellulose: lignin (dimensionless)                | 53:22:25         | 45:25:30         | 32:44:24         | 32:44:24           | 32:44:24         |
| p23–25 | Fine root labile: cellulose: lignin (dimensionless)                  | 30:45:25         | 34:44:22         | 30:45:25         | 30:45:25           | 30:45:25         |

|        |                                                                             |         |         |         |         |          |
|--------|-----------------------------------------------------------------------------|---------|---------|---------|---------|----------|
| p26–27 | Dead wood cellulose: lignin (dimensionless)                                 | 76:24   | 73:27   | 76:24   | 76:24   | 76:24    |
| p28    | Canopy light extinction coefficient (dimensionless)                         | 0.58    | 0.5     | 0.5     | 0.7     | 0.5      |
| p29    | All-side to projected leaf area ratio (dimensionless)                       | 2.0     | 2.6     | 2.6     | 2.0     | 2.6      |
| p30    | Canopy average specific leaf area (SLA) (m <sup>2</sup> kg <sup>-1</sup> C) | 54.2    | 16.4    | 12.0    | 12.0    | 12.0     |
| p31    | Shaded SLA: sunlit SLA (dimensionless)                                      | 2.0     | 2.0     | 2.0     | 2.0     | 2.0      |
| p32    | Fraction of leaf N in Rubisco (dimensionless)                               | 0.075   | 0.10    | 0.055   | 0.03    | 0.03     |
| p33    | Maximum stomatal conductance (m s <sup>-1</sup> )                           | 0.0065  | 0.006   | 0.003   | 0.005   | 0.003    |
| p34    | Cuticular conductance (m s <sup>-1</sup> )                                  | 0.00001 | 0.00006 | 0.00001 | 0.00001 | 0.000001 |
| p35    | Boundary layer conductance (m s <sup>-1</sup> )                             | 0.01    | 0.09    | 0.08    | 0.01    | 0.08     |
| p36    | Vapor pressure deficit: start of conductance reduction (Pa)                 | 1100    | 610     | 930     | 1800    | 930      |
| p37    | Vapor pressure deficit: complete conductance reduction (Pa)                 | 3600    | 3100    | 4100    | 4100    | 4100     |

<sup>a</sup>The parameters at the CBM, QYZ and DHM sites were cited from Li (2019), Li (2018) and Zeng et al. (2008).

<sup>b</sup>CBM, the Changbai Mountains site (in Jilin Province) with a mixed forest of the typical deciduous broad leaf trees (DBT) and the evergreen needle leaf trees (ENT) subjected to a humid temperate monsoon climate.

<sup>c</sup>QYZ, the Qianyanzhou site (in Jiangxi Province) with a mixed forest of the evergreen broad leaf trees (EBT) and the ENT subject to a humid southern subtropical monsoon climate.

## References

- Li, X., 2019. Study on the relationship between vegetation productivity and water use in broadleaved-Korean pine forest zone of Changbai Mountain of Jilin province, Northeast China. Dissertation, Beijing Forestry University.
- Li, Y., 2018. Spatio temporal heterogeneity analysis of parameter sensitivity of ecological process model-The Biome-BGC model as an example. Dissertation. Northwest A & F University.
- Zeng, H., Liu, Q., Feng, Z., Wang, X., Ma, Z., 2008. GPP and NPP study of *Pinus elliottii* forest in red soil hilly region based on Biome-BGC model. Acta Ecologica Sinica, 28, 5314 – 5321.

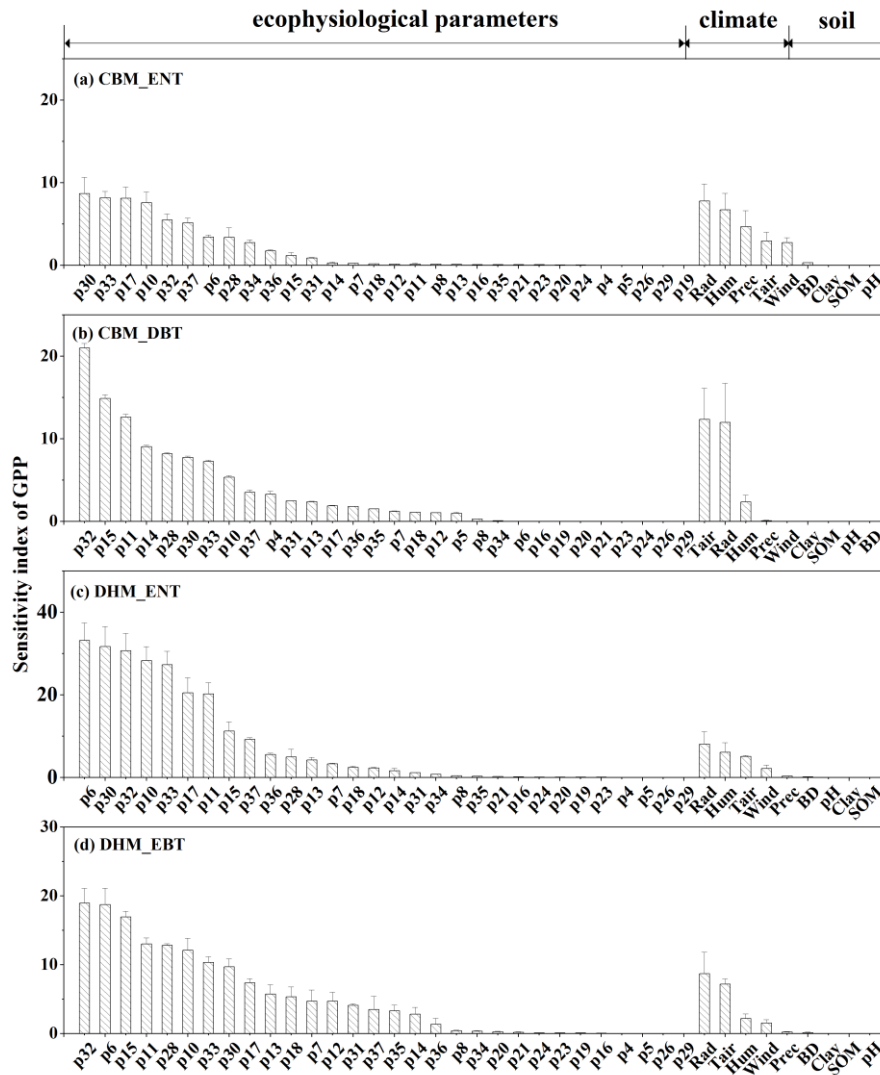

**Figure: S1 Sensitivity indexes of modified CNMM-DNDC simulations on gross primary productivity (GPP) responding to alternations in individual eco-physiological parameters and model inputs of meteorological variables and soil properties for different tree types at CBM and DHM sites. An index is given as the mean (a wide bar) and standard deviation (an error bar) of three indexes, each resulted from the simulations for one year. The parameter name and value for each parameter are referred to Table S2. ENT, DBT and EBT are abbreviations of evergreen needle leaf trees, deciduous broad leaf trees, and evergreen broad leaf trees, respectively.**

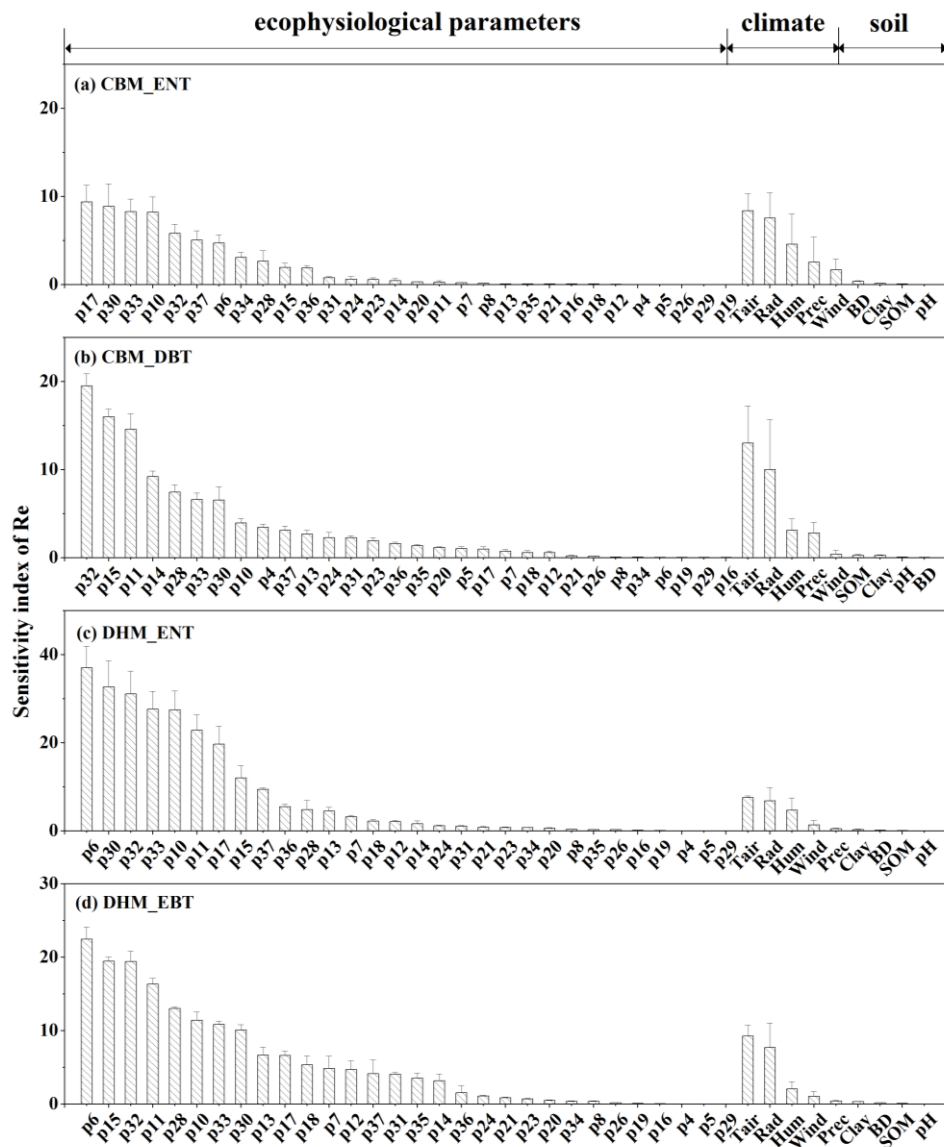

Figure: S2 Sensitivity indexes of modified CNMM-DNDC simulations on ecosystem respiration responding to alternations in individual eco-physiological parameters and model inputs of meteorological variables and soil properties for different tree types at CBM and DHM sites. An index is given as the mean (a wide bar) and standard deviation (an error bar) of three indexes, each resulted from the simulations for one year. The parameter name and value for each parameter are referred to Table S2. ENT, DBT and EBT are abbreviations of evergreen needle leaf trees, deciduous broad leaf trees, and evergreen broad leaf trees, respectively.
