# Supplementary material for: An improved hydro-biogeochemical model (CNMM-DNDC V6.0) for simulating dynamical forest-atmosphere exchanges of carbon and evapotranspiration at typical sites subject to subtropical and temperate monsoon climates in eastern Asia
Source: Copernicus journal article supplement (doi:10.5194/gmd-2024-141), 2024-08-30
Supplement: Supplementary file [file gmd-2024-141-AC1-supplement.pdf]

In this paper, Zhang et al. described and evaluated a new version of the hydro-biogeochemical model CNMM-DNDC that includes a more detailed representation of processes driving carbon and water fluxes between the vegetation and the atmosphere at forest sites. This includes CO<sub>2</sub> and water exchanges at the leaf level, carbon allocation and plant growth and plant mortality. I believe this could be a valuable contribution to the corresponding modelling community. I have several important comments or suggestions however.

First, some important processes or modelling choices are not described or explained. For example how the stomatal and boundary layer conductances to water vapor are computed is not provided. However this is quite key for both carbon and water fluxes. Why mortality rates is constant (if I have well understood) and provided as input is not explained/discussed, while part of mortality could /should be environmentally driven, especially to make predictions under varying conditions.

#### **Revised.**

The calculation of the conductance to the water vapour has been detailed in the Text S1. *“The total leaf conductance to water vapor is calculated by combining the stomatal ( $g_s$ ), boundary ( $g_{bl}$ ), and cuticle ( $g_c$ ) level conductance in parallel for sun and shade leaves, respectively (Eq. 1–4). The maximum rate of stomatal ( $g_{smax}$ ), boundary ( $g_{blmax}$ ), and cuticle ( $g_{cmax}$ ) level conductance are user defined eco-physiological parameters for different forest types detailed in Table S3. A conductance correction factor ( $g_{corr}$ , dimensionless) is calculated for the current air temperature ( $T_{air}$ , °C) and atmospheric pressure ( $p_a$ , Pa) (Eq.5). The cuticle and boundary layer conductance are only scaled by  $g_{corr}$ , but the stomatal conductance is also scaled by a series of multipliers between 0 and 1 (Eq. 6; f), which are photosynthetic photon flux density ( $f_{PPFD}$ ), soil water potential ( $f_{SM}$ ), minimum temperature ( $f_{T_{air}}$ ) and vapor pressure deficit ( $f_{VPD}$ ). The  $f_{PPFD}$  is a function of photosynthetic photon flux density (PPFD,  $\mu\text{mol m}^{-2} \text{s}^{-1}$ ), projected leaf area index of whole canopy (PLAI,  $\text{m}^2 \text{m}^{-2}$ ) and PPFD for 50% stomatal closure ( $75 \mu\text{mol m}^{-2} \text{s}^{-1}$ ), which is calculated for sun and shade leaves, respectively (Eq. 7). The others are calculated based on the current, maximum and minimum values of the variables for all leaves.” (See Text S1 in the revised supplementary materials).*

The discussion about the mortality has been added as the reviewer suggested. *“In the updated model, user-defined mortality rates were used in the simulation. Recent studies showed that the mortality rates at stand level are regulated by various factors, such as the stand age and density, tree basal area, stand squared mean diameter at breast height, standardized precipitation evapotranspiration index, drought length, mean annual temperature and precipitation, elevation and slope (Subedi et al., 2021; Yan et al., 2024). The count-data models combined with random effects of the survey plots have been developed to simulate the tree mortality at different sites (Zhang et al., 2015; Yan et al., 2024). However, the general parameterizations of mortality rates, including the factors of stand, climate and topography, are still not available for the*

*process-oriented models due to knowledge gaps. Thus, in order to predict the carbon cycles of forest using the process-oriented models, more attention should be focused on the simulation of tree mortality under varied environmental conditions and disturbances.” (See lines 564-573 in the revised manuscript).*

Second, using a range of metrics, the study thoroughly highlights the improved performance of the new modified model over the original one in simulated carbon and water fluxes at daily scale. However, it is hard to correctly interpret whether this improved performance truly serves the model predictive objective as nothing is said about the calibration. How many parameters were calibrated in the new version of the model ? how many parameters were calibrated in the original version of the model? Does the improved performance result from an increased number of calibrated parameters? How were the calibration performed actually? Which parameters were calibrated against which variables/data? How transferable is the model to other sites and/or environmental conditions? This has to be described and discussed.

#### **Revised.**

The statements about model calibration have been added. *“The required parameters for forest simulation, including forest type, carbon contents of leaf and stem and some of eco-physiological parameters, were primarily adapted from the field observations provided by the NESDC or from the peer reviewed literatures (Li, 2018; Li, 2019; Fang, 2022). The other eco-physiological parameters referred to the default values (Table 1). The parameter of fraction of leaf nitrogen in Rubisco (p32) was calibrated using the normalized root mean square error (NRMSE) between observed and simulated carbon and water fluxes during 2003–2007. The upper and lower boundaries of the parameter value (p32) were set as twice and half of the default value. The parameter was identified when the value of NRMSE was the minimum.” (See lines 326-332 in the revised manuscript).* The sources of the eco-physiological parameters have been marked in the revised Table 1, indicating the values from literatures or calibration, as well as the range of parameters used for calibration. (See **Table 1 in the revised manuscript**).

The discussions about the reasonable prediction of the updated model have been added as reviewer suggested. *“According to Table 1, except for the CBM site with sufficient localized parameters, the eco-physical parameters in the other two sites primarily came from default values. The comparable model performances at the three sites indicated the applicability of the updated model without various observations and comprehensive calibration. But the localization of eco-physical parameters can improve the model performances without doubt.” (See lines 561-564 in the revised manuscript).*

Also, the model calibration and evaluation relied exclusively on eddy flux data. More details are required on this data. How was the partitioning between GPP and ER performed? What are the uncertainties in those estimates? As model performance is better for GPP and ER with the modified than original model, but not for NEE, that would be an interesting point to discuss.

**Revised.**

The details about eddy flux data have been added in the Text S2. “As the three sites are all members of Chinese Terrestrial Ecosystem Flux Observation and Research Network (ChinaFLUX), the quality control and processing of flux data were carried out based on standardized approaches (Yu et al., 2008), including three-dimensional rotation of the coordinate, correction for the variation of air quality, removal of abnormal values, check of energy balance closure, etc. The data gaps were filled mainly by means of the nonlinear regression method. For small gaps (< 2h), the missing data were linearly interpolated. Larger gaps, such as daytime and night-time gaps, were treated separately when filling the gaps in the CO<sub>2</sub> data sets. The missing daytime flux data were estimated as a function of photosynthetic photon flux density using the Michaelis-Menten equation with a 10-day moving window. To estimate the gross primary productivity (GPP), the ecosystem respiration (ER) of day was estimated with the relationships between the ER of night versus soil temperature and water content (Yu et al., 2008). The ER was sum of corresponding values of day and night. GPP was estimated as the sum of ER and CO<sub>2</sub> flux.” (See Text S2 in the revised supplementary materials).

The discussion about simulated NEE has been added. “At the annual scale, the correlation between simulated and observed GPP was consistently higher than that of NEE, indicating the high sensitivity of NEE to small relative errors in large GPP fluxes (Raczka et al., 2013). Meanwhile, the correlation of ER between simulations and observations was lower than that of GPP, suggesting that ER may be the main contributor to the poor simulation of inter-annual variability in NEE. Although process-oriented models can effectively simulate the different types of carbon fluxes by incorporating the inter-annual influences of temperature and soil moisture, the simulated NEE in this study, as well as others (Keenan et al., 2012; Raczka et al., 2013), can draw a conclusion that process-oriented models do not adequately explain the observed inter-annual variability in NEE, yet.” (See lines 545-552 in the revised manuscript)

Finally, although not a native English speaker myself, I strongly recommend checking the English and phrasing throughout the manuscript, particularly in the introduction.

**Revised.**

The English usage has been revised throughout the manuscript.

Point-by-point comments :

Title : what do you mean exactly by “typical” (same l. 32)? could/should “evapotranspiration” be replaced by “water” to follow the same structure as for “carbon”?

**Revised.**

The title has been revised as the reviewer suggested (See line 3 in the revised manuscript). The “typical” indicates the widely distribution in the corresponding

regions and the statements have been revised throughout the manuscript. “.....*three typical forest sites which are widely distributed in the subtropical and temperate climate regions in eastern Asia (2003–2010)*.....” (See lines 32-33 in the revised manuscript).

33, 97, 100, 102, 281 etc...: prefer “evaluation”/”evaluated” instead of “validation”/”validated”

**Revised.**

The statements have been revised throughout the manuscript.

35: this is a bit hard to follow and suggest rephrasing. Also does a negative value here (e.g. -6%) means that the NRMSE actually increased between the previous version and the version presented here ? It is a bit unclear how the NRMSE of ET can be reduced by 38% at daily scale, but increased by 3% at annual scale...

**Revised.**

The sentences have been revised to avoid confusion (See lines 35-36 in the revised manuscript). The explanations have been added in the section of 3.1. “*Although the simulated ET at the daily scale by the original model showed significant deviations with much more intensive variations, especially for sites of QYZ and DHM, the trade-off effects of extreme values for the original models led to comparable performances of both models in simulating annual ET (Fig. 2j–l).*” (See lines 458-461 in the revised manuscript)

55: “in comparison” to what ? I am not sure I would oppose data and models, both are needed and complementary (and without data, numerical models would be far less advanced).

**Revised.**

The sentence has been revised as the reviewer suggested. “*The numerical models are promising tools to combine data from different sources and characterize the vegetation and soil processes more completely.*” (See lines 55-56 in the revised manuscript).

59: I am not sure this defines “process-based models” and would rephrase this sentence. At least specify “process-based models “of what.

**Revised.**

The sentence has been revised as the reviewer suggested. “..... *and process-oriented models, the last type of model is an important scientific tool that was established based on basic theories of physics, chemistry, and biogeochemistry processes*” (See lines 58-59 in the revised manuscript).

89: it would be great to provide the reader with at list a brief description of the specificities of the CNMM-DNDC model: in what respect is it different (or not) with the other hydro-biogeochemical models, especially the ones mentioned in the previous paragraph?

**Revised.**

The description of the key specificity of the CNMM-DNDC model has been added based on the comments. *“Compared with the models above mentioned, the key specificity of CNMM-DNDC is the realization of modeling horizontal transportations of water and nutrients in both soil surface and profile from grid to grid, which supports the simulation of hydro-biogeochemical processes at the catchments.”* (See lines 88-90 in the revised manuscript).

96: Zhang et al. 2018 is repeated twice.

**Revised.**

The citations have been revised (See lines 85-93 in the revised manuscript).

97: “simultaneously” should be moved elsewhere.

**Revised.**

The sentence has been rephrased (See line 94 in the revised manuscript).

107: unclear why mortality is related to the simplified representation of biomass allocation here, can you specify? This is better distinguished l. 160-161.

**Revised.**

The sentences have been rewritten to make it clear. *“Such simplification may induce large uncertainties, as photosynthate allocation is substantially important for accurately simulating the carbon and nitrogen cycles of forest ecosystems.”* (See lines 102-104 in the revised manuscript).

115 (also 118): what do you mean by “typical” ? what is a “typical” forest? What do the three sites have in common, and what make them different?

**Revised.**

The “typical” means the widely distribution and representativeness of forest types in the corresponding regions. The sentences have been rewritten to make it clear and the descriptions have been revised throughout the manuscript. *“.....in the typical forest ecosystems of the eastern Asia which are widely distributed in the corresponding regions.”* (See line 302 in the revised manuscript).

119: if I understood this correctly this should be phrased the other way around: simulated outputs (GPP, ER, etc...) are sensitive to some parameter values/model inputs.

**Revised.**

The related sentences have been revised throughout the manuscript as the reviewer suggested. *“(iii) identify the eco-physiological parameters and model inputs which can substantially influence the simulated GPP and ER of the examined forests using different methods.”* (See lines 122-124 in the revised manuscript).

130: what a “comprehensive function “ is unclear to me.

**Revised.**

The sentences have been rephrased to make it clear. The previous “comprehensive function” indicated the extension of model’s functions to improve the model’s abilities. “*Its later versions were established through several updates to extend its functions and improve the universally applicability*” (See lines 132-133 in the revised manuscript).

137: “it has realized systematic simulation of “: what you mean here is unclear to me.  
**Revised.**

The sentences have been revised. The “systematic simulation” indicates the simulation for the continuum of atmosphere, vegetation, soil, and water. “*The model regards the atmosphere, vegetation, soil, and water as a continuum and simulates the tightly coupled carbon, nitrogen and water cycles of the continuum at the catchment based on basic theories of physics, chemistry, and biogeochemistry.*” (See lines 134-136 in the revised manuscript).

139: “be user-defined” or “be defined by the user”

**Revised.**

The sentences have been revised. “*The simulated soil depth and temporal and spatial resolutions of the model are all allowed to be defined by the user depending on the availability of driving data and/or research objectives.*” (See lines 142-143 in the revised manuscript).

140: is 4m a hard constraint? What prevents from simulating deeper soil (which might be relevant in some systems)?

**Revised.**

The sentences have been revised to make it clear. “4m” is not a hard constraint, but module of groundwater circulation is not included in the CNMM-DNDC. “*The simulated soil profile could be down to 4 m deep or deeper, but the module of groundwater circulation is not included.*” (See lines 144-145 in the revised manuscript).

161 (alos l. 107): it is not 100% clear what you mean by “photosynthetic allocation”, do you mean “photosynthate allocation”?

**Revised.**

The “photosynthetic allocation” has been replaced by “photosynthate allocation” throughout the manuscript to make it clear.

168: “mortality of forests” or “mortality of trees”? What is the biological resolution of this new module? Is it individual-based, cohort-based, stand-based?

**Revised.**

The sentences have been revised to make it clear. This module can be thought as an estimate of stand level processes. “*This module can be thought as an estimate of stand level processes that have been aggregated and averaged to a per unit area basis and can simulate the processes of photosynthesis, litter decomposition, photosynthate*

*allocation, respiration and mortality of forests.*” (See lines 171-174 in the revised manuscript).

171: “live stems”: does it refer to sapwood or to both sapwood and heartwood of living trees? Similarly, “dead stems”: does it refer to heartwood or to both sapwood and heartwood of dead trees? (Same question for live/dead coarse roots). If the latter not sure why this is distinguished from a woody debris pool? Also distinction between sapwood and heartwood is needed to correctly represent stem respiration for example.

**Revised.**

The sentence has been added to detail the contents. The live stems and coarse roots can be regarded as the sapwood, while the dead stems and coarse roots is the heartwood. The respiration was calculated for live and dead tissues, respectively. *“The live stems and coarse roots can be regarded as the sapwood, while the dead stems and coarse roots is the heartwood. The coarse woody debris pool is the first pool that dead coarse roots and dead stem wood enter when they die. This pool then fragments into the litter pools over time.”* (See lines 177-180 in the revised manuscript).

193: how is the conductance to (and not “of”) water vapour  $g_{H_2O}$  computed ? does it include both the stomatal and leaf boundary layer conductance ? this is key. Humidity and wind speed are probably used for that computation ? Are those variables considered to be the same for sun and shade leaves?

**Revised.**

The details about the calculation of the conductance to the water vapour ( $g_{H_2O}$ ) has been added in the supplementary materials. *“As the three sites are all members of Chinese Terrestrial Ecosystem Flux Observation and Research Network (ChinaFLUX), the quality control and processing of flux data were carried out based on standardized approaches (Yu et al., 2008), including three-dimensional rotation of the coordinate, correction for the variation of air quality, removal of abnormal values, check of energy balance closure, etc. The data gaps were filled mainly by means of the nonlinear regression method. For small gaps (< 2h), the missing data were linearly interpolated. Larger gaps, such as daytime and night-time gaps, were treated separately when filling the gaps in the CO<sub>2</sub> data sets. The missing daytime flux data were estimated as a function of photosynthetic photon flux density using the Michaelis-Menten equation with a 10-day moving window. To estimate the gross primary productivity (GPP), the ecosystem respiration (ER) of day was estimated with the relationships between the ER of night versus soil temperature and water content (Yu et al., 2008). The ER was sum of corresponding values of day and night. GPP was estimated as the sum of ER and CO<sub>2</sub> flux.”* (See Text S1 in the revised supplementary materials).

197: in some systems, the co-limitation of photosynthetic capacities by leaf phosphorous content might be important (Domingues et al. 2010; Walker et al. 2014). Is it the case in the study systems?

### **Reponses.**

In the current version, the co-limitation of photosynthetic capacities by leaf phosphorous has not been included, which could be incorporated in future study. The discussion about this has been added. *“In this version, the co-limitation of photosynthetic capacities by leaf phosphorous has not been considered.”* (See lines 208-209 in the revised manuscript). *“Many studies also emphasized the co-limitation of photosynthetic capacity by leaf nitrogen and phosphorus which has been identified as globally important determinants (Domingues et al., 2010; Walker et al., 2014). Thus, the effects of leaf phosphorus should be considered in the development of the process-oriented models.”* (See lines 521-523 in the revised manuscript).

203, 208: where these values come from ?

### **Revised.**

The reference has been added as the reviewer suggested (See lines 24 and 219 in the revised manuscript).

223: how is the proportion of nitrogen retranslocated determined?

### **Revised.**

The sentence has been revised to make it clear. *“.....while the nitrogen removed from the leaves before senescence is re-translocated based on the ratio of carbon to nitrogen of leaf litter.”* (See lines 233-234 in the revised manuscript).

229-230: the rationale supporting the fact that “the actual decomposition [is] scaled depending on the competing plant nitrogen demand during allocation” is unclear to me, can you elaborate ? and how is the plant nitrogen demand during allocation determined ?

### **Responses.**

The detailed descriptions about the actual litter decomposition rate were presented in the revised version. *“The immobilized nitrogen by microbes in litter decomposition is provided by soil available mineral nitrogen pool which also offers the nitrogen required by plant growth. If the soil available mineral nitrogen cannot satisfy the demands of plant growth and potential litter decomposition, the actual decomposition rate would be scaled based on the fractions of two components (plant growth and litter decomposition) and soil available mineral nitrogen, which has been detailed during allocation in the section of 2.1.2.4.”* (See lines 247-251 in the revised manuscript).

236-236: if soil water pressure refers to soil water potential, I would suggest to replace “pressuer” by “potential” and replace Minpressure by , Satpressure by , and same for SMpressure, which are much more common notation.

### **Revised.**

The descriptions of equations have been revised as reviewer suggested. *“.....with the calculated soil water potential under saturation. The minimum soil water potential*

*(Minpotential) was set as  $-10 \text{ Mpa}$ .*” (See line 246 in the revised manuscript).

236: In this section, I found it particularly hard to identify what is a variable updated/computed by the model at each timestep from what is a fixed parameter (user-defined or not) or a constant. An additional column in table S2 providing the symbol used in the main text would help. And a similar table with variable could be useful.

**Revised.**

The Table S4 about litter decomposition has been updated to make it clear. *“The fractions related to the decomposition processes of leaf, fine root, stem and litters, as well as the maximum rate constants and biomass loss through heterotrophic respiration, are all defined as constants (Table S4).”* (See Table S4 and lines 243-244 in the revised supplementary materials).

244: where does the carbon available for allocation come from of there is a carbon pool deficit? Are there carbon reserves? This is not mentioned l. 171.

**Revised.**

The statement has been revised to make it clear. *“If the difference is negative, it means a carbon pool deficit. The repayment of this carbon pool deficit is calculated in the following time steps so that the deficit is over in one year and the available carbon for allocation is first allocated to alleviate the deficit.”* (See lines 257-259 in the revised manuscript).

245: can you explain why?

**Revised.**

The explanation has been added as reviewer suggested. *“All new allocations to other organs or tissues are constrained by the new leaf carbon allocation due to the allocation priorities (Waring and Running, 2007). As under stressed conditions, trees tend to modify the allocation of carbohydrates so that new leaf is favoured over the production of stem growth (Waring and Pitman, 1985).”* (See lines 259-262 in the revised manuscript).

266: what does the 8 (denominator) represent in equ. 28? Unit? Same for equ. 29.

**Revised.**

The details have been added to make it clear. *“.....with the conversion coefficient (8.0) from daily level to 3 hours”* (See line 283 in the revised manuscript). *“.....with the conversion coefficient (86400) from daily level to seconds”* (See line 288 in the revised manuscript).

267: “relationship” à “slope”. Is this value common to all tissues?

**Revised.**

The statement has been revised to make it clear. *“.....with a relationship of  $0.218 \text{ kg C d}^{-1} \text{ kg}^{-1} \text{ N}$  for all the calculated tissues (Ryan, 1991)”* (See lines 284-285 in the revised manuscript).

277: if mortality rates are fully user-defined (and fixed throughout simulations), I wonder how the model could establish predictions under varying environmental conditions and disturbances (e.g. climate change is mentioned as a motivation in the introduction). Although I fully acknowledge the difficulties to simulate mortality through process-based principles given the important knowledge gaps that still remain, I would expect at least a discussion of this modelling choice. What would be the aim of the model in the end ? As the plant carbon budget is computed, carbon deficit (or starvation) could for example influences such mortality rates.

**Revised.**

The discussion has been added as the reviewer suggested. *“In the updated model, user-defined mortality rates were used in the simulation. Recent studies showed that the mortality rates at stand level are regulated by various factors, such as the stand age and density, tree basal area, stand squared mean diameter at breast height, standardized precipitation evapotranspiration index, drought length, mean annual temperature and precipitation, elevation and slope (Subedi et al., 2021; Yan et al., 2024). The count-data models combined with random effects of the survey plots have been developed to simulate the tree mortality at different sites (Zhang et al., 2015; Yan et al., 2024). However, the general parameterizations of mortality rates, including the factors of stand, climate and topography, are still not available for the process-oriented models due to knowledge gaps. Thus, in order to predict the carbon cycles of forest using the process-oriented models, more attention should be focused on the simulation of tree mortality under varied environmental conditions and disturbances.”* (See lines 564-573 in the revised manuscript).

308: which parameters were calibrated and how? Unless I missed something this important information is missing.

**Revised.**

The statements about model calibration have been added. *“The required parameters for forest simulation, including forest type, carbon contents of leaf and stem and some of eco-physiological parameters, were primarily adapted from the field observations provided by the NESDC or from the peer reviewed literatures (Li, 2018; Li, 2019; Fang, 2022). The other eco-physiological parameters referred to the default values (Table 1). The parameter of fraction of leaf nitrogen in Rubisco (p32) was calibrated using the normalized root mean square error (NRMSE) between observed and simulated carbon and water fluxes during 2003–2007. The upper and lower boundaries of the parameter value (p32) were set as twice and half of the default value. The parameter was identified when the value of NRMSE was the minimum.”* (See lines 326-332 in the revised manuscript).

318-320: which parameters were drawn from literature or field observations, and which were calibrated?

**Revised.**

The sources of the eco-physiological parameters have been marked in the revised

Table 1, indicating the values from literatures or calibration, as well as the range of parameters used for calibration. (See Table 1 in the revised manuscript).

320: is a soil depth of 1.5 relevant for all three sites? Do you have any information on soil and root depths at these sites?

**Revised.**

The sentence has been revised with references to make it clear. *“The simulated soil profile (0–1.5 m in depth), with the last layer set as rock, was divided into 16 layers and the layer thicknesses were 0.05, 0.1 and 0.5 cm for the 0–0.5, 0.5–1 and 1–1.5 m depths, respectively, according to the previous studies (Guan et al., 2006; Zeng et al., 2008; Zhou et al., 2013).”* (See lines 333-335 in the revised manuscript).

324: how long is it to run 13 years of simulations? What were the spatial and temporal resolutions of those simulations. How were the climate data used for this spin-up?

**Revised.**

The details about resolutions and climate data have been added in the revised manuscript. For the site scale simulations of three forests, the spin-up take no more than 5 minutes. *“The simulations of three forest sites were done with the temporal resolution of 3h at the site scale.”* (See lines 335-336 in the revised manuscript). *“The climate data used for model spin-up were obtained from the China meteorological forcing dataset (1979–2018) (<https://data.tpdc.ac.cn>).”* (See lines 342-343 in the revised manuscript).

461: it is not crystal clear to me how the different variables can be substantially improved at the daily scale, but not at the annual scale (cf my similar comment on l.35). Can you explain this?

**Revised.**

The explanations have been added as the reviewer suggested. *“Although the simulated ET at the daily scale by the original model showed significant deviations with much more intensive variations, especially for sites of QYZ and DHM, the trade-off effects of extreme values for the original models led to comparable performances of both models in simulating annual ET (Fig. 2j–l).”* (See lines 458-461 in the revised manuscript).

496-497: ok but in absence of details on your calibration approach, it is unclear if your model and study is not in a similar situation with eddy flux data: can the model produce reasonable predictions in sites without long-term eddy flux data for calibration? It would be great to answer this question. How transferable is the model in different sites/environmental conditions? How important are the calibration steps for predictions?

**Revised.**

The statements about model calibration have been added as mentioned above. The discussions about the reasonable prediction of the updated model have been added as reviewer suggested. *“According to Table 1, except for the CBM site with sufficient*

*localized parameters, the eco-physical parameters in the other two sites primarily came from default values. The comparable model performances at the three sites indicated the applicability of the updated model without various observations and comprehensive calibration. But the localization of eco-physical parameters can improve the model performances without doubt.” (See lines 561-564 in the revised manuscript).*

510: ok but is such satellite data reliable/good enough to quantify the “subtle changes in leaf phenology” (l. 507) at mote forest sites?

**Revised.**

*The sentences have been rewritten to avoid confusion. “The worst performance for the forest at the DHM site may be attributed to the errors in simulating the photosynthesis of EBT due to the difficulty in modeling the subtle changes in the leaf phenology. Such a difficulty has also been encountered by previous studies, which might be solved by incorporating new mechanisms derived from observations and integrating more complete environmental regulations to vegetation production (Raczka et al., 2013; Yuan et al., 2014). In addition, previous study has showed that assimilating satellite data, e.g., LAI, can significantly improve the performance of process-oriented models in simulating the spatial patters of daily GPP (Yan et al., 2016), which may provide a solution to improve the ability of the modified CNMM-DNDC for simulating the spatial and temporal dynamics of forest GPP at large scales.” (See lines 514-521 in the revised manuscript).*

520: it would be interested to include  $Q_{10}$  in your sensitivity analysis then. Why not?

**Revised.**

*The sensitivity analysis of  $Q_{10}$  in the process of maintenance respiration has been added as the reviewer suggested. “In updated growth module, the  $Q_{10}$  was used for the calculation of maintenance respiration, which not only was a component of ER but also affected the photosynthesis directly. The OAT sensitivity analysis showed that the simulated GPP was more sensitive to  $Q_{10}$  than the simulated ER which was also contributed by growth respiration and soil heterotrophic. In addition, the sensitivity index of  $Q_{10}$  was higher at the CBM due to the high latitude, which is consistent with the field observation (Yu et al., 2008; Zhang et al., 2019a).” (See lines 533-538 in the revised manuscript).*

552: actually, it may be relevant to use different values of SLA for sun and shade leaves given the high plasticity of this trait along light gradient (Niinemets et al. 2015). This could be discussed as well.

**Revised.**

*The discussion has been added in view of the reference recommended by the reviewer. “Previous study also found that light gradients within-canopy substantially affect photosynthetic productivity of leaves influenced by the different combinations of structural, chemical and physiological traits, such as SLA (Niinemets et al., 2015). Maybe using different values of SLA for sun and shade leaves along light gradients*

*could improve the simulation of photosynthesis in future model studies.” (See lines 586-589 in the revised manuscript).*

References:

Walker, A. P., Beckerman, A. P., Gu, L., Kattge, J., Cernusak, L. A., Domingues, T. F., ... & Woodward, F. I. (2014). The relationship of leaf photosynthetic traits— $V_{\text{cmax}}$  and  $J_{\text{max}}$ —to leaf nitrogen, leaf phosphorus, and specific leaf area: a meta-analysis and modeling study. *Ecology and evolution*, 4(16), 3218-3235.

Domingues, T. F., Meir, P., Feldpausch, T. R., Saiz, G., Veenendaal, E. M., Schrodte, F., ... & Lloyd, J. O. N. (2010). Co-limitation of photosynthetic capacity by nitrogen and phosphorus in West Africa woodlands. *Plant, Cell & Environment*, 33(6), 959-980.

Niinemets, Ü., Keenan, T. F., & Hallik, L. (2015). A worldwide analysis of within-canopy variations in leaf structural, chemical and physiological traits across plant functional types. *New Phytologist*, 205(3), 973-993.

**Revised.**

The above references have been added in the revised manuscript supporting the results and discussions.
